# 1 Usage-inspired Interactive Digital Pathology System for Pathology Instruction in Indonesia

2

3 Ery Kus Dwianingsih<sup>1,2\*</sup>, Dewa Nyoman Murti Adyaksa<sup>1</sup>, Petr Walczysko<sup>3</sup>, Auliana Hayu  
4 Kusumastuti<sup>1</sup>, Jean-Marie Burel<sup>3</sup>, Jason R. Swedlow<sup>3\*</sup>

5

6 <sup>1</sup>Department of Anatomical Pathology, Faculty of Medicine, Public Health and Nursing, Gadjah  
7 Mada University, Yogyakarta, Indonesia

8 <sup>2</sup>Sardjito General Hospital, Yogyakarta, Indonesia

9 <sup>3</sup>Divisions of Computational Biology and Molecular Cell and Developmental Biology,  
10 University of Dundee, Dundee, United Kingdom

11

12 \*Corresponding authors: [ery\\_malueka@ugm.ac.id](mailto:ery_malueka@ugm.ac.id), [jrswedlow@dundee.ac.uk](mailto:jrswedlow@dundee.ac.uk)

13

## 14 **Abstract**

### 15 **Background**

16 COVID-19 shifted Indonesian education to remote learning. The Gadjah Mada University  
17 (UGM) Faculty of Medicine Public Health and Nursing (UGM FMPHN) struggled with studying  
18 tumor images remotely due to resource shortages. In parallel, the University of Dundee's  
19 (UoD's) OME team created OMERO for image management, inspiring UGM to use OMERO to  
20 develop GamaPath for web-based image viewing. This report details its implementation,  
21 effectiveness, and potential expansion to practical sessions and workshops in Indonesia.

22

### 23 **Methods**

24 Teaching slides were scanned in Indonesia and imported into OMERO at UoD. UGM students,  
25 residents, and clinicians used GamaPath for anatomical pathology training for several sessions  
26 between 2022 and 2024. GamaPath was also used for national continuing education sessions for  
27 pathologists held through 2023. Experiences and evaluations were collected via online surveys  
28 and results were assessed by modified MARuL scores.

29

### 30 **Results**

31 The UoD-UGM collaboration produced an application satisfying the initial need for remote  
32 teaching during COVID lockdown. However, after returning to in-person teaching, access to  
33 interactive training materials online was considered to be an essential part of effective instruction  
34 by students and faculty. The GamaPath application provided flexible access to interactive  
35 materials that enhanced the educational experience. Of 256 survey respondents, mean modified  
36 MARuL score for GamaPath web app was 40.92 (SD = 10.73) with a median of 41 (IQR = 34–  
37 50). Among the 107 pathologists who used GamaPath for national continuing education, the  
38 majority gave it the highest possible rating for functionality, ease of use, and overall experience.

39

## 40 **Conclusions**

41 UGM's FMPHN collaborated with UoD to create a digital pathology platform based on  
42 OMERO, improving image analysis and feedback for practical sessions and workshops using  
43 GamaPath.

44

45 **Keywords:** anatomical pathology; digital education; digital learning; digital pathology; medical  
46 education; modified MARuL

47

## 48 **Introduction**

49 Like many locations worldwide, the COVID-19 pandemic transformed education in Indonesia,  
50 causing an abrupt and difficult shift to remote learning for safety. Schools quickly adapted to  
51 distance learning to maintain education services.<sup>1,2</sup> Before March 2020, instruction of anatomical  
52 pathology students at Gadjah Mada University used traditional microscopes, with students  
53 directly viewing individual slides. The pandemic halted hands-on training, and initially,  
54 instruction was provided using single-field images in PowerPoint for Zoom lectures. This had the  
55 obvious limitations of incomplete coverage and compromised resolution. The result was a  
56 degraded experience for both faculty and students.

57

58 The sudden change highlighted a key aspect of pathology training in Indonesia and most likely in  
59 other low- and middle-income countries (LMICs). Modern clinical practice relies on robust  
60 pathology services, requiring access to labs and trained personnel. Expert staff are fundamental,  
61 offering diagnosis and therapeutic advice, particularly in LMICs where local disease knowledge

62 is vital, so developing appropriate training programs to develop and maintain expertise in  
63 pathology is crucial. However, LMICs face resource limitations in delivering updated pathology  
64 training. Standard textbooks often lack locally relevant disease information. Digital pathology,  
65 involving digitally scanned Whole Slide Images (WSIs), offers a solution but presents  
66 challenges. High costs, limited availability of slide scanners, and the need for high-performance  
67 computing (HPC) systems complicate implementation.<sup>3</sup>

68  
69 These deficits are more than inconveniences. The United Sustainable Development Goals (UN  
70 SDGs) 3 (Good Health and Well-Being) and 4 (Quality Education) prioritize education and  
71 healthcare access for robust societies. At UGM, over 50% of anatomical pathology students are  
72 women. Access to quality education is essential for developing highly trained female clinicians  
73 (UN SDG 5, Gender Equality). The pandemic disrupted education, particularly affecting the  
74 training of expert clinical staff and women severely.<sup>4</sup>

75  
76 To address this challenge, we established an intercontinental collaboration between FMPHN  
77 UGM (Yogyakarta, Indonesia) and the University of Dundee (UoD, Dundee, UK) that provided  
78 digital pathology instruction for UGM students and that has now become an Indonesian national  
79 resource. At FMPHN UGM, there are no slide scanners nor advanced HPC facilities, but an  
80 internationally recognized medical school provides clinical training. At UoD, the Open  
81 Microscopy Environment (OME) team has developed OMERO, an open-source image data  
82 management system that provides web-based WSI viewing.<sup>5</sup> OMERO offers secure image data  
83 sharing over a standard network connection. The collaboration provided a long-distance  
84 pathology learning method for UGM students and faculty using digital pathology. This initiative  
85 was called the GamaPath project.

86  
87 In this report, we describe the work to date on GamaPath as a tool for instruction in anatomy and  
88 pathology, evaluate its use and utility by UGM students, and extend its use to regional and  
89 national case review workshops for pathologists across Indonesia.

90

## 91 **Methods**

### 92 **Technical Solution**

93 *Slide Scanning*

94 We sent a set of teaching slides to Jakarta for whole slide scanning using an Aperio CS2 from  
95 Leica Biosystems Imaging, Inc., Leica Microsystems (SEA) Pte Ltd (Singapore, Jakarta,  
96 Indonesia) (Figure 1). The slide scanner operates on the Microsoft Windows 10 operating  
97 system, captures slide images from the desktop, and creates high-quality digital slides. It has a  
98 five-slide capacity and 20X and 40X magnification capabilities, making it a highly reliable  
99 solution for medium-volume sites. The Aperio CS2's intuitive interface and easy-to-use design  
100 consistently deliver rapid creation of high-resolution digital slides, with a >98% first-time scan  
101 success rate. After the scanning of the slides was completed, all the WSIs were transferred back  
102 to UGM using external hard drives and then uploaded to the OMERO platform via  
103 OMERO.importer.<sup>5</sup> The imported images were organized in OMERO based on their label image  
104 and the name or requirements of the virtual lab session. Login credentials, lasting from three  
105 days to one month, are rotated after each virtual session.

106

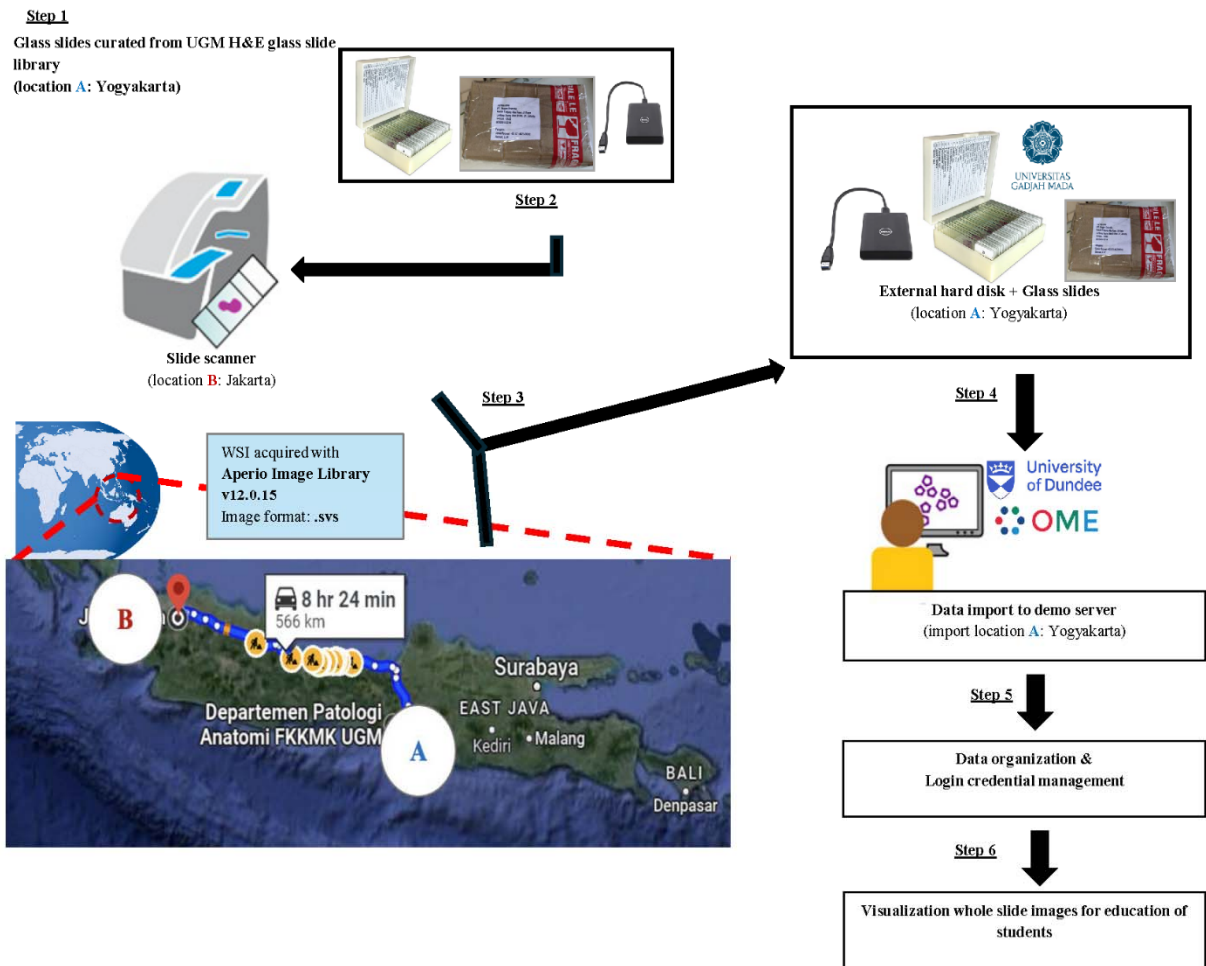

107

## 108 **Figure 1. GamaPath-OMERO Workflow System**

109 The curated slides library was collected from the Department of Anatomical Pathology at FMPN  
110 UGM (location A, in Yogyakarta). The teaching glass slides are stained with Hematoxylin-eosin  
111 (H&E) and various immunohistochemical stains. The slides were carefully packed to prevent  
112 breakage and driven to Jakarta along with an external hard drive for the whole slide scanning  
113 process (location B). They were then scanned using the Aperio Digital Pathology Slide Scanner  
114 CS2. The scanned results were stored on a hard drive and then returned alongside the slides to  
115 location A. The WSI files in SVS file format were imported into an OMERO running at UoD.  
116 Initially, we used the OMERO demo server, but a dedicated resource was made available in  
117 September 2023. The imported data were organised and annotated to supplement the  
118 undergraduate students' educational journey and provide valuable resources for pathology  
119 residents to enhance their training and knowledge.

120

## 121 **Web-based Access**

122 GamaPath uses OMERO, a client-server application for storing and managing imaging data. The  
123 Bio-Formats library<sup>6</sup> reads WSIs in SVS format, supporting a multi-resolution format.  
124 GamaPath's OMERO web client offers scalable WSI viewing and web-based access for students  
125 and educators. Benefits include practical slide storage, easy maintenance, and improved user  
126 experience, enabling remote classroom work. WSI technology allows users to choose  
127 magnification without specific technical skills, unlike traditional microscopes.<sup>7,8</sup>

128

### 129 ***Friendly User Interface***

130 OMERO's web interface offers an interactive, visually engaging user experience. It allows users  
131 to explore microscopic digital images, with options to zoom in and out and select specific  
132 features. This platform facilitates efficient study and research with customization options.  
133 Students, particularly novices, can intuitively adapt to digital images for a seamless experience.  
134 Clinical medicine has also validated Digital Slides from Virtual Microscopes for histopathology  
135 diagnosis, showing no significant difference from traditional slides.<sup>9,10</sup>

136

### 137 ***Open Source***

138 The high costs of WSI scanners and Virtual Microscope software hinder the adoption of digital  
139 microscopy in medical education at UGM. The key for GamaPath was system reconfigurability  
140 to meet UGM faculty and student needs and integrate curriculum. We incorporated open-source  
141 software for UGM customization, like adding their logo, organizing data by modules, and  
142 creating an access structure for resource management. Using OMERO supports transparency,  
143 collaboration, and the inclusion of UGM's developments in future updates. This approach  
144 reduces costs and supports integration with other educational tools.

145

### 146 ***Flexibility***

147 During the COVID-19 pandemic, educators were forced to transition to an online distance  
148 learning pedagogy.<sup>11,12</sup> GamaPath is designed to allow flexibility in deployment and usage. This  
149 adaptability, hopefully, supports diverse teaching methods and accommodates varying levels of  
150 technological infrastructure within educational settings in Indonesia.

151

### 152 ***Remote Hosting***

153 Students have returned to in-person learning, but many pandemic innovations like remote  
154 learning are being integrated into everyday practice.<sup>13</sup> Digitizing the workspace has improved  
155 learning. A survey found pathology students using Digital Slide in a remote clerkship reported  
156 increased interest and understanding.<sup>14</sup> Installing an OMERO system needs IT resources and  
157 staff, which are not always available. Thus, the OME team offers a free server, the OMERO  
158 Demo server, at UoD for evaluation. During the GamaPath initiative's initial phase, UGM used  
159 UoD's OMERO Demo server, loading 235 WSIs (519 GB). Despite the limitations of the Demo  
160 server, UGM trained students and clinicians. In late 2023, UoD provided dedicated IT resources  
161 for a customized OMERO platform for UGM. This helped UGM manage and expand digital  
162 pathology resources efficiently, offering accessibility and scalability.

163

### 164 *Cost-Effective*

165 By utilizing open-source software and adopting remote hosting strategies, GamaPath offers a  
166 cost-effective and sustainable solution for digital pathology education. This is critical for  
167 resource-constrained institutions seeking to enhance educational offerings without significant  
168 financial investments in proprietary technologies or infrastructure.

169

### 170 **Evaluation of the Web-Apps value using Modified MARuL Score**

171 In this study, undergraduate students and residents filled out the modified MARuL (Mobile App  
172 Rubric for Learning) questionnaire during practical sessions. The MARuL scoring system is a  
173 quick and user-friendly method that teachers can use to evaluate the value of an app for just-in-  
174 time learning.<sup>15</sup> This rubric comprises items in four categories: Part A (Teaching & Learning  
175 Measures), Part B (User-Centered Measures), Part C (Professional Measures), and Part D  
176 (Usability Measures). These criteria represent the value of just-in-time learning as assessed by  
177 students. The MARuL category score is calculated by adding the rating for each item on a 5-  
178 point Likert-type scale (0 = does not fulfill the item requirements, 1 = poorly fulfills the  
179 requirements, 2 = somewhat fulfills the requirements, 3 = mostly fulfills the requirements, and 4  
180 = fully meets the requirements) within each category to reach a total score for that category  
181 (teaching and learning = 36, user-centered = 28, professional measures = 12, and usability = 28).  
182 Adding up the scores of the categories gives the user an overall score of 104. Apps are then



183 categorized by their scoring range (< 50 = not at all valuable, 51-69 = potentially valuable, and >  
184 69 = probably valuable).<sup>15</sup>

185  
186 Our study omitted Part C (Professional Measures) of the MARuL score because the respondents  
187 were students. The three categories used were teaching and learning (n = 3), user-centered (n =  
188 7), and usability (n = 4). In this study, the modified MARuL category score was calculated by  
189 adding the rating for each item on a 5-point Likert-type scale within each category to reach a  
190 total score for that category (teaching and learning = 12, user-centered = 28, and usability = 16.  
191 Summing the categories gives the user an overall score of 56 (Supplementary Table S1). Apps  
192 are then categorized by their scoring range (< 25 = not at all valuable, 25-35 = potentially  
193 valuable, and > 35 = probably valuable).

194  
195 In addition to conducting a practical session for students, a workshop was organized for  
196 pathologists. The User Feedback Score was utilized to evaluate the functionality, ease of use, and  
197 overall experience of the GamaPath web application for anatomical pathology training. This  
198 questionnaire consists of 5-point Likert-type scale (1 = very dissatisfied, 2 = dissatisfied, 3 =  
199 neutral, 4 = satisfied, and 5 = very satisfied) (Supplementary Table S2).

200

## 201 **Results**

202 The timeline of our project is shown in Figure 2. FMPHN UGM has driven the GamaPath  
203 project, beginning with digital slide scanning and then defining and implementing WSI sharing  
204 in UGM's anatomical pathology department using OMERO. The project aligns with the school's  
205 vision of becoming a world-class, innovative, and superior faculty of medicine by optimizing the  
206 use of data and information technology to serve the nation's and humanity's interests. Therefore,  
207 the project has received four years of consecutive limited funding, allowing the FMPHN UGM  
208 team to evaluate aspects of the implementation to date, including the practical session for  
209 undergraduates and residents and a professional workshop for pathologists. FMPHN UGM's use  
210 of OMERO started with a test account running on the OMERO Demo Server provided by the  
211 UoD-based OME team. FMPHN UGM handled all configuration, delivery, and evaluation of  
212 GamaPath using the Dundee-based OMERO Demo server from Q2 2022 to Q4 2023, ensuring  
213 the system was tuned to its needs.



214

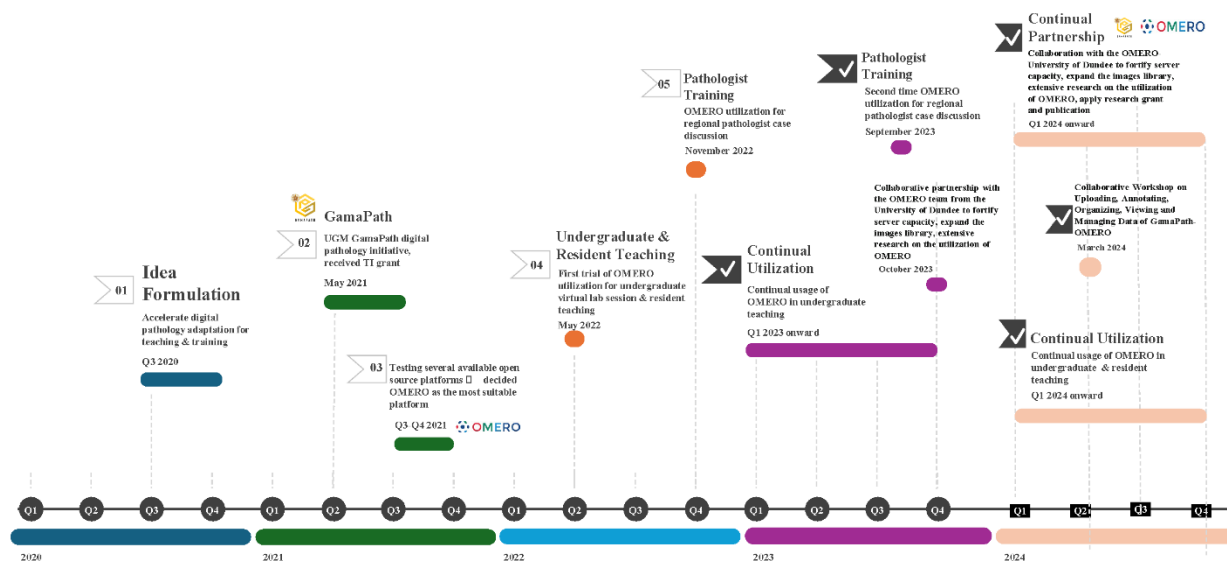

215

216 **Figure 2. GamaPath-OMERO Project Development Timeline.**

217 The idea for the GamaPath-OMERO project was formulated in the third quarter of 2020 to  
 218 accelerate the adaptation of digital pathology for teaching and training purposes. In the following  
 219 year, GamaPath digital pathology was initiated at UGM and received University support in the  
 220 form of a small grant in May 2021. After testing several available open-source platforms from  
 221 the third to the fourth quarter of 2021, OMERO was chosen as the most suitable platform for  
 222 GamaPath. The first trial of OMERO utilization for undergraduate virtual lab sessions and  
 223 resident teaching began in May 2022. Following the success of the first trial, GamaPath-  
 224 OMERO was then used for pathologist training in November 2022, marking the first utilization  
 225 for regional pathologist case discussions. Additionally, GamaPath-OMERO saw its second  
 226 utilization in September 2023 for regional pathologist case discussions. In October 2023, a  
 227 collaborative partnership with the OMERO team from UoD was established to improve the  
 228 server capacity, expand the image library, conduct extensive research on the utilization of  
 229 OMERO, and apply for research grants and publications. In March 2024, a collaborative  
 230 workshop on uploading, annotating, organizing, viewing, and managing data of GamaPath-  
 231 OMERO was held at Universitas Gadjah Mada (UGM). Then, the utilization of OMERO in  
 232 undergraduate and resident teaching will continue from 2024 onward.

233

234 The GamaPath user interface is shown in Figure 3. Sets of WSI datasets are organized and  
 235 annotated using the OMERO.web interface (Fig. 3A). Different sets of WSIs, selected for each  
 236 of the FMPHN UGM pathology courses are displayed in different folders in the left-hand panel  
 237 of the browser interface. Users open a fully interactive viewing module (Fig. 3B) by double-

238 clicking on the WSI names or thumbnails in the center panel. The web browser UI application  
239 connects to an OMERO server, which stores and serves all data and configurations<sup>5</sup>.  
240

A

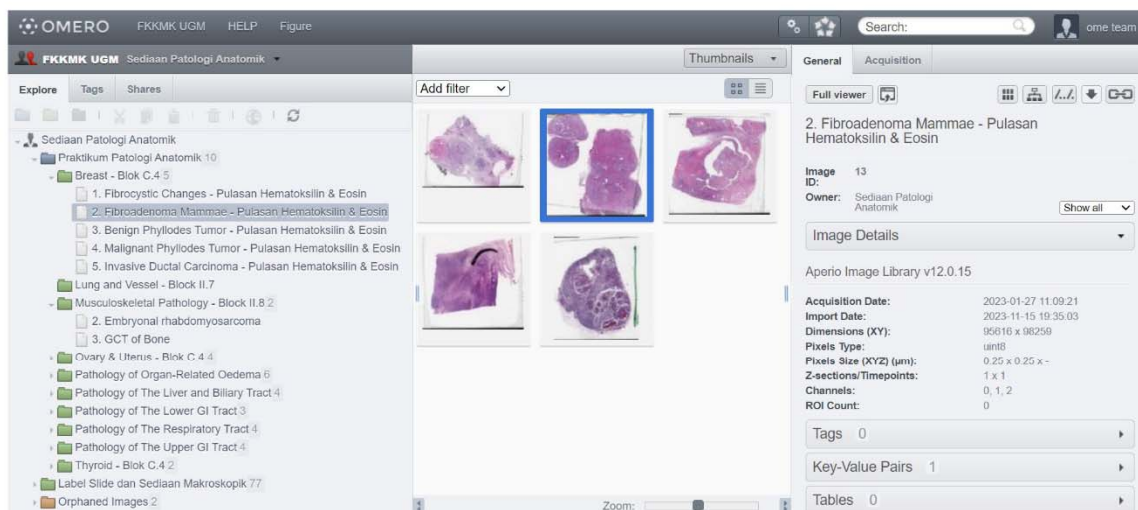

B

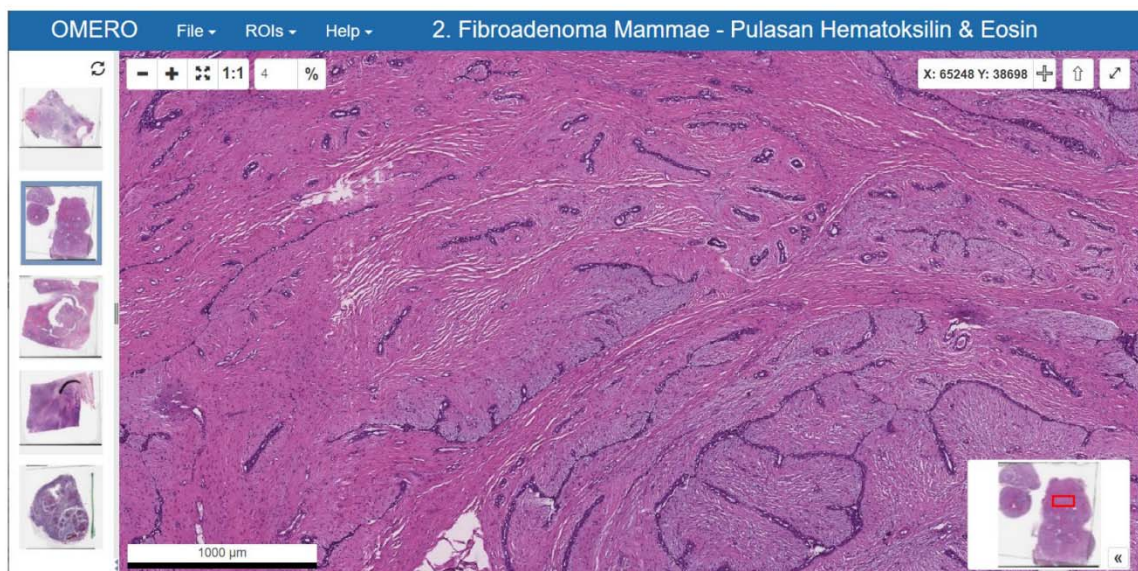

241  
242 **Figure 3. GamaPath User Workflow and Interface**  
243 A. The screenshot shows the typical layout of a virtual microscopy lab into separate folders  
244 (projects and datasets in OMERO.web (see Allan et al (2012). Each department (anatomical  
245 pathology, histology, etc.) or organ system pathology (musculoskeletal, neuropathology, etc.) is

246 assigned to different members of a specific group for students or pathologists. Dataset content is  
 247 tailored based on the learning objectives required in each student/course module.  
 248

249 B. The screenshot shows the typical layout of an OMERO.iviewer after double-clicking on an  
 250 image thumbnail in the central panel of OMERO.web (A). The left panel of the viewer gives the  
 251 user access to all WSIs within a dataset for easy comparison of different slides and cases.  
 252

253 The GamaPath platform runs on a virtual machine with 100GB RAM, 16 cores, and 1.5TB  
 254 storage, with data backed up at UoD and a local WSI copy at UGM. To date, 911 GB of data  
 255 (60% more than the Demo server) has been imported. The data trains UGM undergraduates (72  
 256 slides), residents (78 slides), and clinicians across Indonesia (218 slides, 517 GB). Clinicians  
 257 accessed 26 slides in the 2022 symposium, 51 more in 2023, and will access 141 new slides in  
 258 Q4 2024 (Table 1). The new OMERO server has been active since January 2024, with over 3400  
 259 logins in the first six months, indicating GamaPath's growing importance for UGM (Figure 4).  
 260

261 **Table 1. Distribution of The Slides Used to Train Undergraduate and Residents**

| Course               | Total number of slides | Access by Undergraduate          | Access by Residents |
|----------------------|------------------------|----------------------------------|---------------------|
| Histology            | 71 (82 GB)             | First and Second year: 41 slides | 30 slides extra     |
| Anatomical Pathology | 79 (380 GB)            | Second and third year: 31 slides | 38 slides extra     |

262 From a total of 71 slides (82 GB) for the histology course, 41 slides were by the first and second  
 263 undergraduate students, and 30 extra slides were accessed by residents. From a total of 79 slides  
 264 (380 GB) for the anatomical pathology course, 31 slides were accessed by the second and third  
 265 undergraduates, and 38 extra slides were accessed by residents.

266 Abbreviations: GB – Gigabyte.

267

268

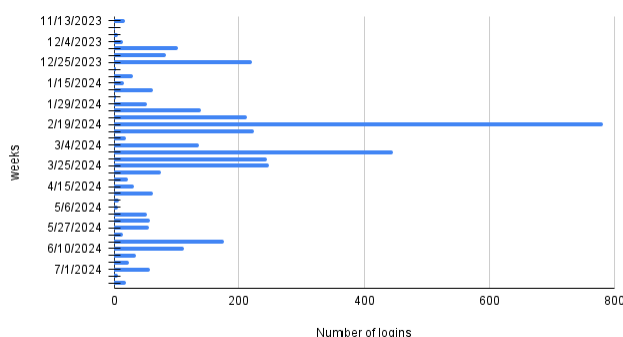

269

270 **Figure 4. Number of Logins to GamaPath-OMERO**

271 Plot shows the number of logins per week. The platform is used regularly by residents and  
272 clinicians. The spikes correspond to either teaching blocks or access prior to assessments.

273

274

275 Once the first version of GamaPath was validated, a formal collaboration began between the  
276 UGM and UoD teams. This resulted in the provision of an OMERO system at UoD dedicated to  
277 FMPHN UGM's use, with scalable storage and computing resources (see Methods). This  
278 approach was selected because while UGM had a small server available on its campus, the  
279 number of WSIs needed to make GamaPath useful for students and faculty required additional  
280 storage capacity. However, with the success of the GamaPath project, we aim to migrate the  
281 system to UGM-based systems once they are available.

282

283 During daily practices, anatomical pathology residents at the FMPHN UGM encounter cases at  
284 Sardjito General Hospital, a UGM-affiliated teaching hospital. Residents initially interpret the  
285 cases, which consultant pathologists review, revise, and verify. Some cases are routine, and  
286 others may be challenging, requiring confirmation through additional examinations like  
287 immunohistochemical analysis or PCR, for instance, spindle cell sarcoma or pleomorphic  
288 sarcoma. Rare cases, such as adamantinoma of the bone, may also be encountered. By collecting  
289 these cases, scanning them, and incorporating them into GamaPath, the morphological images of  
290 those cases can be preserved and studied by generations of residents regardless of whether they  
291 encounter them in daily practice.

292

293 **Introduction and Evaluation of GamaPath and OMERO**

294 During the practical session, the instructor demonstrated techniques for using and visualizing  
295 microscopic digital images in GamaPath. This was followed by a lecture on various tumor  
296 entities, focusing on digital images, like ductal carcinoma of the breast. Students then  
297 independently explored and analyzed the images to deepen their understanding. At the end of the  
298 session, all students completed a modified MARuL questionnaire to provide feedback on their  
299 experiences with GamaPath.

300

301 Among 256 practical session respondents, 82 were male and 174 female. In this study, the  
 302 modified MARuL score for teaching and learning measures was 8.8008 (SD 2.56434), with a  
 303 median score of 9 (IQR = 7–11). The modified MARuL score result for user-centered measures  
 304 was 20.3711 (SD 5.54686) with a median score of 21 (IQR = 16.25–25.0). The modified  
 305 MARuL score result for usability measures was 11.7500 (SD 3.20049) with a median score of  
 306 11.75 (IQR = 9.25–14.0) (Table 2).

307

308 **Table 2. The Modified MARuL Score Result of GamaPath-OMERO Application**

| Category and Item             | Frequency of Score 3 and 4 | Median (IQR)           | Mean (SD)                |
|-------------------------------|----------------------------|------------------------|--------------------------|
| <b>Teaching and learning</b>  |                            | <b>9 (7–11)</b>        | <b>8.8008 (2.56434)</b>  |
| Capacity to generate learning | 154 (60.2%)                | 3 (2–4)                | 2.81 (1.028)             |
| Relevance to study/course     | 200 (78.1%)                | 3 (3–4)                | 3.08 (0.832)             |
| Efficiency                    | 177 (69.1%)                | 3 (2–4)                | 2.91 (0.974)             |
| <b>User-centered</b>          |                            | <b>21 (16.25–25.0)</b> | <b>20.3711 (5.54686)</b> |
| Subjective quality            | 174 (68.0%)                | 3 (2–4)                | 2.90 (0.926)             |
| Satisfaction                  | 167 (65.2%)                | 3 (2–4)                | 2.84 (0.952)             |
| Perceived usefulness          | 189 (74.0%)                | 3 (2–4)                | 3.04 (0.855)             |
| Perceived importance          | 182 (71.1%)                | 3 (2–4)                | 2.97 (0.879)             |
| User experience               | 157 (61.3%)                | 3 (2–4)                | 2.78 (0.978)             |
| Intention to reuse            | 197 (77.0%)                | 3 (3–4)                | 3.00 (0.847)             |
| Engagement                    | 169 (66.0%)                | 3 (2–4)                | 2.84 (0.917)             |
| <b>Usability</b>              |                            | <b>12 (9.25–14.0)</b>  | <b>11.7500 (3.20049)</b> |
| Aesthetics                    | 192 (75.0%)                | 3 (2.5–4.0)            | 2.98 (0.890)             |
| Functionality                 | 160 (62.5%)                | 3 (2–4)                | 2.82 (0.967)             |
| Ease of use                   | 181 (70.7%)                | 3 (2–4)                | 2.95 (0.884)             |
| Advantage of using app        | 197 (77.0%)                | 3 (3–4)                | 3.00 (0.842)             |

309 The modified MARuL score result of the GamaPath-OMERO application was from 256  
 310 respondents of undergraduate students in the anatomical pathology practical sessions.  
 311 Abbreviations: IQR – Interquartile Range; SD – Standard Deviation

312

313 Figure 5A–C show the distribution of scores in the different evaluation categories. Students rated  
 314 GamaPath highly and overall found that it enhanced their learning. The distributions of all  
 315 measured features confirmed the value of the application. The Kolmogorov-Smirnov test ( $p =$   
 316  $0.000, p < 0.05$ ) showed non-normal data (Supplementary Figure S1, Supplementary Figure S2).



317 The mean of the modified MARuL score was 40.92 (SD = 10.729), with a median of 41 (IQR =  
318 34–50) (Figure 5D, Supplementary Table S3), indicating that the application should be  
319 considered as “probably valuable”. Scores ranged from 3 to 56 (Supplementary Table S4,  
320 Supplementary Figure S3). We conclude that the GamaPath application is providing substantial  
321 benefit to students but that further improvements and development should be undertaken to make  
322 the application as useful as possible.  
323

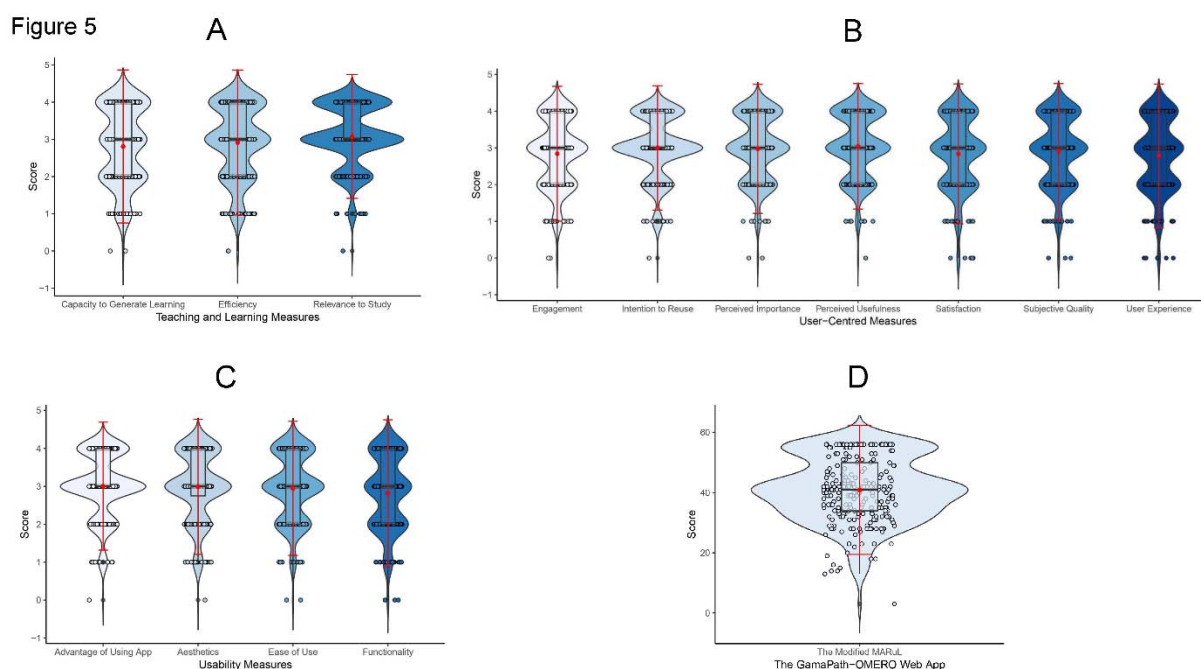

324  
325 **Figure 5. Summary of Student Survey Responses.**  
326 Violin plots for (A) Teaching and learning measures, (B) User-centered measures, (C) Usability  
327 measures, and (D) Modified MARuL Score Result. Violin plots are hybrids of boxplots and  
328 density plots used here to visualize the distribution of modified MARuL score results. The thick  
329 band represents the 50th percentile, the thinner bands represent the 25th and 75th percentiles.  
330 The red dot represents the mean (40.92), the red line represents the standard deviation (10.729),  
331 and the black thick band represents the median (41).  
332

### 333 Using GamaPath for National Case Review

334 Besides the practical session for undergraduates and residents, a workshop for professional  
335 pathologists in Indonesia was also held to assess the system's suitability for them. Participants  
336 joined the workshop via Zoom and viewed the slides presented through GamaPath, all directly  
337 connecting to the OMERO server based at UoD. This was especially vital considering

338 Indonesia's geography, enabling participants from Java, Sumatra, Sulawesi, and Borneo islands  
339 to participate and benefit from the training. During the workshop, the instructor delivered a  
340 detailed lecture using PowerPoint. The digital slides of tumor cases from the GamaPath library  
341 were also discussed with the participants. Subsequently, pathologists had the opportunity to  
342 individually examine and analyze the digital images of each tumor type, allowing them to gain  
343 practical experience and enhance their understanding of the subject. At the workshop,  
344 pathologists were requested to complete a user feedback questionnaire to gather valuable insights  
345 regarding their experiences and feedback using GamaPath.

346  
347 Out of a total of 120 pathologists who participated in the workshop, of which more than 50%  
348 were female, 107 pathologists gave their feedback as follows: 63 respondents (58.9%) rated the  
349 functionality aspect with a score of 5 out of 5, 52 respondents (48.6%) rated the ease of use  
350 aspect with a score of 5 out of 5, and 49 respondents (45.8%) provided a score of 5 out of 5 for  
351 the overall experience of the GamaPath web application (Table 3). The Kolmogorov-Smirnov  
352 test ( $p = 0.000$ ,  $p < 0.05$ ) showed non-normal data (Supplementary Figure S4). The mean of user  
353 feedback score result was 4.56 (SD 0.552) with a median score of 5 (IQR = 4–5) for the  
354 functionality aspect, 4.36 (SD 0.706) with a median score of 4 (IQR = 4–5) for the ease of use,  
355 and 4.36 (SD 0.664) with a median score of 4 (IQR = 4–5) for the overall experience (Table 3,  
356 Figure 6A). The mean of the user feedback score was 13.29 (SD = 1.754) with a median of 13  
357 (IQR = 12–15) (Figure 6B; Supplementary Table S5). Scores ranged from 7 to 15  
358 (Supplementary Table S6, Supplementary Figure S5).

359  
360 **Table 3. The User Feedback Score Result of GamaPath-OMERO Implementation for**  
361 **Anatomical Pathology Training**

| Category           | Frequency of Score 5 | Median (IQR) | Mean (SD)    |
|--------------------|----------------------|--------------|--------------|
| Functionality      | 63 (58.9%)           | 5 (4–5)      | 4.56 (0.552) |
| Ease of Use        | 52 (48.6%)           | 4 (4–5)      | 4.36 (0.706) |
| Overall Experience | 49 (45.8%)           | 4 (4–5)      | 4.36 (0.664) |

362 Out of a total of 120 pathologists who participated in the workshop, of which more than 50%  
363 were female, 107 pathologists gave their feedback.

364 Abbreviations: IQR – Interquartile Range; SD – Standard Deviation



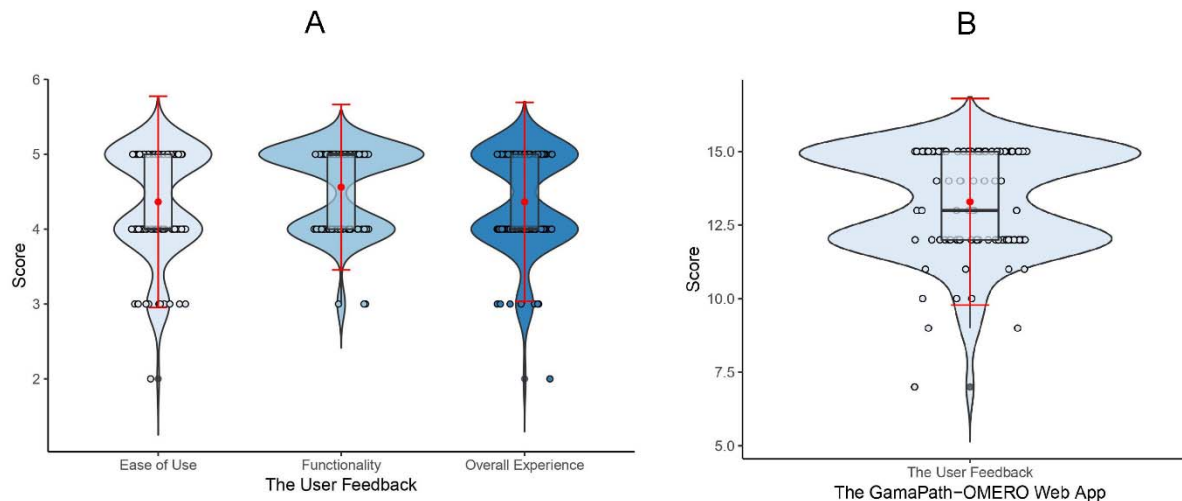

365

### 366 **Figure 6. Summary of Pathologist Survey Responses.**

367 Violin plots for (A) Ease of Use, Functionality, and Overall Experience, and (B) The  
368 Pathologist's User Feedback Score Result. Violin plots are hybrids of boxplots and density plots  
369 used here to visualize the distribution of user feedback score results. The thick band represents  
370 the 50th percentile, the thinner bands represent the 25th and 75th percentiles. The red dot  
371 represents the mean (13.29), the red line represents the standard deviation (1.754), and the black  
372 thick band represents the median (13).

373

### 374 **Discussion**

375 We have designed, constructed, and successfully run a widely accessible digital training solution  
376 for sharing WSIs and training undergraduate students, residents, and pathologists in Indonesia  
377 called GamaPath. The solution leverages open-source software and strategic collaboration  
378 between UoD and UGM, which have partnered to exchange expertise, know-how, and  
379 technology resources to benefit the respective institutions' communities. GamaPath was  
380 originally built to address the teaching conditions caused by the COVID-19 pandemic. However,  
381 the strong acceptance and adoption of GamaPath by all stakeholders has driven the continuation  
382 and growth of the project. At the time of writing, over 360 WSI datasets have been stored in  
383 GamaPath and used for instruction and review by several hundred students, residents, and  
384 pathologists at UGM and across Indonesia.

385

386 GamaPath was originally designed to address a critical need for remote instruction but has  
387 rapidly grown far beyond its initial scope and aims. This was possible because of the  
388 commitments of UGM and UoD to identify paths for collaboration as well as the open-source

389 nature of the OMERO software that is used as its foundation. By using an open solution, UGM's  
390 project team could decide how to configure the system to best deliver on their goals. Discussions  
391 between the UGM and UoD technical teams on the configuration of OMERO proceeded with  
392 both teams speaking from a position of knowledge, which allowed rapid and creative solutions to  
393 emerge.

394  
395 Originally focused on UGM's needs, GamaPath has expanded its impact, aligning with several  
396 UN Sustainable Development Goals: SDG 3 (health workforce), SDG 4 (affordable quality  
397 education and technical skills for youth), SDG 5 (women's participation and empowerment  
398 through technology), and SDG 17 (international cooperation and knowledge sharing). These  
399 alignments emerged from the project's collaborative and open-source approach. This is  
400 consistent with the foundations of the principles of open-source distribution<sup>16</sup> and provides an  
401 example of how open-source technology and transnational institutional collaboration contribute  
402 towards the delivery of the UN SDGs.

403  
404 In March 2024, the ongoing collaboration between UGM and UoD led to a collaborative  
405 workshop held at FMPHN UGM, dedicated to exploring the full potential of the GamaPath  
406 platform. The workshop was attended by members of the Anatomical Pathology Department  
407 staff and residents, as well as representatives from various other departments, including  
408 Histology, Parasitology, and Microbiology. Notably, a representative from the Faculty of  
409 Dentistry also took part in the workshop. The goal of the workshop was to delve into the  
410 intricacies of uploading, annotating, organizing, viewing, and managing data, with the ultimate  
411 aim of maximizing the platform's capabilities in the context of FMPHN UGM.

412  
413 This initiative empowered FMPHN at UGM to lead digital pathology education without  
414 requiring extensive resources. Using the OMERO Demo server, FMPHN UGM conducted  
415 workshops for students, residents, and pathologists, yielding impressive outcomes. A strategic  
416 partnership with UoD enabled the provision of a larger server, expanding the digital repository  
417 and long-term data storage. FMPHN UGM now excels in digitizing anatomical pathology  
418 resources, enhancing its education system, and attracting students locally and regionally,  
419 solidifying UGM's reputation. For UoD, the collaboration increases engagement with

420 international partners, develops equitable partnerships, and promotes joint research and capacity  
421 building in health and education systems using GamaPath.

422  
423 To measure mobile learning potential in clinical skills, users should evaluate an app's value in  
424 supporting student learning. MARuL and user feedback scores help users assess an app's  
425 effectiveness. These scores provide a structured framework for evaluating an app, ensuring it  
426 meets educational needs and contributes to clinical skills development.<sup>15,20</sup> Assessing the  
427 modified MARuL score during practical sessions and the user feedback score in the pathologist  
428 workshop for the GamaPath Web platform showed its significant value. Further evaluation and  
429 optimization of GamaPath's usability are essential for user experience and effectiveness,  
430 benefiting educational and professional applications.

431  
432 Using dedicated IT resources, we expanded GamaPath's whole slide images (WSI), enabling  
433 FMPHN UGM to store a wide range of cases. These cases support laboratory sessions and  
434 workshops and include rare ones, ensuring long-term access and continuity in medical education.  
435 This provides invaluable resources for students and practitioners, exposing them to diverse  
436 pathological conditions. WSI in digital pathology is used for distance teaching and AI-based  
437 research, such as protein expression quantification and mutation detection.<sup>17-19</sup> These advances  
438 will further enhance UGM's digital pathology capabilities.

439

## 440 **Contributors**

441 EKD and DNMA conceptualized and designed the study and were supported in executing the  
442 study by PW, JMB, and JRS. DNMA, PW, and JMB led data collection and import. DNMA and  
443 AHK were responsible for the data cleaning, analysis, and interpretation. AHK, PW, and JMB  
444 prepared tables and figures. EKD wrote the first draft of the manuscript. All authors contributed  
445 substantially to the critical review, editing, and revision of the manuscript. All authors had full  
446 access to all data in the study, approved the final version of the manuscript, and had final  
447 responsibility for the decision to submit the manuscript for publication.

448

## 449 **Declaration of interests**

450 JRS is founder and CEO of Glencoe Software which develops products based on OMERO.

451

## 452 **Data Sharing**

453 The data in this study is available from the Supplementary Info.

454

## 455 **Acknowledgments**

456 The development of digital pathology at UGM was supported by the Technology and  
457 Information Grant (Hibah Teknologi Informasi) provided by the UGM Faculty of Medicine,  
458 Public Health, and Nursing to EKD. The UoD-based OME team was supported by an award  
459 from The Wellcome (Ref.: 221361/Z/20/Z). Travel funds for the UoD team were funded by the  
460 Scottish Education Exchange Programme Test and Learn Project.

461

## 462 **References**

- 463 1 Abidah A, Hidaayatullaah HN, Simamora RM, Fehabutar D, Mutakinati L. The Impact of  
464 Covid-19 to Indonesian Education and Its Relation to the Philosophy of “Merdeka Belajar.”  
465 Studies in Philosophy of Science and Education. 2020;1(1):38–49.  
466 <https://doi.org/10.46627/sipose.v1i1.9>
- 467 2 Radina N, Balakina Y. Challenges for Education during the Pandemic: An Overview of  
468 Literature. Voprosy Obrazovaniya / Educational Studies Moscow. 2021;(1):178–94.
- 469 3 Kumar N, Gupta R, Gupta S. Whole Slide Imaging (WSI) in Pathology: Current  
470 Perspectives and Future Directions. J Digit Imaging. 2020;33(4):1034–40.  
471 <https://doi.org/10.1007/s10278-020-00351-z>
- 472 4 Flor LS, Friedman J, Spencer CN, Cagney J, Arrieta A, Herbert ME, et al. Quantifying the  
473 effects of the COVID-19 pandemic on gender equality on health, social, and economic  
474 indicators: a comprehensive review of data from March 2020 to September 2021. The Lancet.  
475 2022;399(10344):2381–97. [https://doi.org/10.1016/S0140-6736\(22\)00008-3](https://doi.org/10.1016/S0140-6736(22)00008-3)
- 476 5 Allan C, Burel JM, Moore J, Blackburn C, Linkert M, Loynton S, et al. OMERO: flexible,  
477 model-driven data management for experimental biology. Nat Methods. 2012;9(3):245–53.  
478 <https://doi.org/10.1038/nmeth.1896>
- 479 6 Linkert M, Rueden CT, Allan C, Burel JM, Moore W, Patterson A, et al. Metadata matters:  
480 access to image data in the real world. Journal of Cell Biology. 2010;189(5):777–82.  
481 <https://doi.org/10.1083/jcb.201004104>

- 482 7 Nauhria S, Hangfu L. Virtual microscopy enhances the reliability and validity in  
483 histopathology curriculum: Practical guidelines. MedEdPublish. 2019;8:28.  
484 <https://doi.org/10.15694%2Fmep.2019.000028.2>
- 485 8 Saco A, Bombi JA, Garcia A, Ramírez J, Ordi J. Current Status of Whole-Slide Imaging in  
486 Education. Pathobiology. 2016;83(2–3):79–88. <https://doi.org/10.1159/000442391>
- 487 9 Liscia DS, Bellis D, Biletta E, D’Andrea M, Croci GA, Dianzani U. Whole-Slide Imaging  
488 Allows Pathologists to Work Remotely in Regions with Severe Logistical Constraints Due to  
489 Covid-19 Pandemic. J Pathol Inform. 2020;11(1):20. [https://doi.org/10.4103%2Fjpi.jpi\\_32\\_20](https://doi.org/10.4103%2Fjpi.jpi_32_20)
- 490 10 Samuelson MI, Chen SJ, Boukhar SA, Schnieders EM, Walhof ML, Bellizzi AM, et al.  
491 Rapid Validation of Whole-Slide Imaging for Primary Histopathology Diagnosis. Am J Clin  
492 Pathol. 2021;155(5):638–48. <https://doi.org/10.1093/ajcp/aqaa280>
- 493 11 Darici D, Reissner C, Brockhaus J, Missler M. Implementation of a fully digital histology  
494 course in the anatomical teaching curriculum during COVID-19 pandemic. Annals of Anatomy -  
495 Anatomischer Anzeiger. 2021;236:151718. <https://doi.org/10.1016/j.aanat.2021.151718>
- 496 12 Tanaka KS, Ramachandran R. Perceptions of a Remote Learning Pathology Elective for  
497 Advanced Clinical Medical Students. Acad Pathol. 2021;8:23742895211006850.  
498 <https://doi.org/10.1177/23742895211006846>
- 499 13 Frazier PI, Cashore JM, Duan N, Henderson SG, Janmohamed A, Liu B, et al. Modeling for  
500 COVID-19 college reopening decisions: Cornell, a case study. Proceedings of the National  
501 Academy of Sciences. 2022;119(2). <https://doi.org/10.1073/pnas.2112532119>
- 502 14 Samueli B, Srer N, Jotkowitz A, Taragin B. Remote pathology education during the  
503 COVID-19 era: Crisis converted to opportunity. Ann Diagn Pathol. 2020;49:151612.  
504 <https://doi.org/10.1016/j.anndiagpath.2020.151612>
- 505 15 Gladman T, Tylee G, Gallagher S, Mair J, Rennie SC, Grainger R. A Tool for Rating the  
506 Value of Health Education Mobile Apps to Enhance Student Learning (MARuL): Development  
507 and Usability Study. JMIR Mhealth Uhealth. 2020;8(7):e18015. <https://doi.org/10.2196/18015>
- 508 16 DiBona C, Ockman S, Stone M, et al. Open Sources: Voices from the Open Source  
509 Revolution. California: O’Reilly; 1999.
- 510 17 Evans AJ, Depeiza N, Allen SG, Fraser K, Shirley S, Chetty R. Use of whole slide imaging  
511 (WSI) for distance teaching. J Clin Pathol. 2021;74(7):425–8. [https://doi.org/10.1136/jclinpath-](https://doi.org/10.1136/jclinpath-2020-206763)  
512 [2020-206763](https://doi.org/10.1136/jclinpath-2020-206763)

- 513 18 Nakagaki R, Debsarkar SS, Kawanaka H, Aronow BJ, Prasath VBS. Deep learning-based  
514 IDH1 gene mutation prediction using histopathological imaging and clinical data. *Comput Biol*  
515 *Med.* 2024;179:108902. <https://doi.org/10.1016/j.compbiomed.2024.108902>
- 516 19 Rizzardi AE, Johnson AT, Vogel RI, Pambuccian SE, Henriksen J, Skubitz AP, et al.  
517 Quantitative comparison of immunohistochemical staining measured by digital image analysis  
518 versus pathologist visual scoring. *Diagn Pathol.* 2012;7(1):42. [https://doi.org/10.1186/1746-](https://doi.org/10.1186/1746-1596-7-42)  
519 [1596-7-42](https://doi.org/10.1186/1746-1596-7-42)
- 520 20 Strifler L, Fahim C, Hillmer MP, Barnsley JM, Straus SE. Development and usability testing  
521 of an online support tool to identify models and frameworks to inform implementation. *BMC*  
522 *Med Inform Decis Mak.* 2024;24(1):182. <https://doi.org/10.1186/s12911-024-02580-6>
- 523
